# Supplementary material for: Comprehensive data set of in-situ hydraulic stimulation experiments for geothermal purposes at the Äspö Hard Rock Laboratory (Sweden)
Source: Copernicus journal article supplement (doi:10.5194/essd-2023-170), 2023-06-30
Supplement: Supplementary file [file essd-2023-170-AC1-supplement.pdf]

Reviewer comments in normal font, our responses in italics.

Very nice paper. I have a few comments.

Abstract - State data location data will be archived

*The status of the data location and availability will be updated once the paper is finalized (according to the journal policy).*

Line 39 Change "2018+ Homestake Mine underground tests at Sanford Facility in North Dakota," to "2018+ EGS Collab Project underground tests at Sanford Underground Research Facility (SURF) in South Dakota,"

*Modified.*

Line 73 Explain the 29 fracture stages. To me a fracture stage is a location, but there are apparently 6 locations.

*We specified this further: Hydraulic tests were performed at six injection intervals (test intervals). In each hydraulic test interval, several fracturing and re-fracturing stages were performed. In total, 29 treatments (stages) of the granitic rock mass at six locations (test intervals) in the horizontal injection borehole were performed underground.*

Line 102 "long" should be quantified. These long boreholes are short to most people.

*"short" and "long" have been quantified in the text and a description of the "short" boreholes has been added.*

Section 2.3.1 State the intervals for these tests.

*We refer to Zang et al. (2017) for details on the test intervals and injection schemes used.*

Line 169 Change "permeable" to "permeability".

*Modified.*

Table 1. "M4" to "M10". Verify that these are described in the paper.

*Fully agree. These were indeed missing in the text. We added a short description in the text and included the borehole labels also in Fig. 1.*

Line 202 The location or reference for the "data archive" needs to be stated.

*We have no control on this. As stated above, this will updated by the journal once the paper is finalized.*

Figure 6. Define the numbers above each trace.

*A description is given in the figure caption "Waveforms are normalized with scale factors (in mV) labeled at the end of each trace." We added the unit of the scale factor "(in mV)".*

Line 253 State the location of the metadata.

*As stated above, this will updated by the journal once the paper is finalized.*
